# Supplementary material
Source: publisher site journal article supplement (https://www.dovepress.com/article/273365)
Supplement: Supplementary file 1 [file get_supplementary_file.php]

Table S1. Pharmacists’ stigma of patients with depression (n=86): Effect of gender and if Pharmacist or someone close to him/her suffer from depression

| Item | **Pharmacist or someone close to him/her suffer from depression** | | P value† | **Gender** | | P value† |
| --- | --- | --- | --- | --- | --- | --- |
| **No**  **(n=40)** | **Yes (n=46)** | Male (n=26) | Female (n=60) |
| Patients with depression are dangerous to others | 3.3 ± 1.2 | 3.2 ± 1.0 | 0.82 | 3.2 ± 1.1 | 3.4 ± 1.0 | 0.02 |
| Patients with depression are unpredictable | 2.4 ± 1.0 | 2.2 ± 1.1 | 0.31 | 2.3 ± 1.0 | 2.3 ± 1.1 | 0.80 |
| Patients with depression are hard to talk to | 3.1 ± 1.1 | 3.3 ± 1.3 | 0.48 | 3.2 ± 1.2 | 3.1 ± 1.2 | 0.50 |
| Patients with depression feel different | 1.7 ± 0.7 | 1.8 ± 0.9 | 0.74 | 1.7 ± 0.8 | 1.8 ± 0.9 | 0.26 |
| Patients with depression have only themselves to blame | 4. 5 ± 0.8 | 4.7 ± 0.6 | 0.17 | 4.6 ± 0.7 | 4.6 ± 0.6 | 0.39 |
| Patients with depression should pull themselves together | 3.3 ± 1.4 | 3.4 ± 1.4 | 0.74 | 3.4 ± 1.4 | 3.4 ± 1.4 | 0.81 |
| Patients with depression are not improved if treated | 4.5 ± 1.2 | 4.2 ± 1.2 | 0.33 | 4.3 ± 1.2 | 4.3 ± 1.2 | 0.82 |
| Patients with depression will never recover | 4.5 ± 0.7 | 4.5 ± 0 .7 | 0.89 | 4.5 ± 0.7 | 4.5 ± 0.7 | 0.45 |

Results are mean ± standers deviation. † Student's t-test.

Table S2. Pharmacists’ Confidence about Medication Consultation for Depressive patients (PCMCD) (n=86): Effect of gender and if Pharmacist or someone close to him/her suffer from depression

| Item | **Pharmacist or someone close to him/her**  **suffer from depression** | | P value† | **Gender** | | P value† |
| --- | --- | --- | --- | --- | --- | --- |
| No  (n=40) | Yes  (n=46) | Male (n=26) | Female (n=60) |
| I can understand the patient’s medical condition | 3.9 ± 1.1 | 4.3 ± 1.0 | 0.09 | 4.4 ± 0.8 | 4.0 ± 1.1 | 0.079 |
| I can perceive change in the patient’s medical condition | 3.7 ± 1.3 | 4.3 ± 1.0 | 0.02 | 4.1 ± 1.1 | 3.9 ± 1.2 | 0.61 |
| I can comprehend the patient’s comorbid illness | 3.9 ± 1.2 | 4.4 ± 1.0 | 0.06 | 4.3 ± 1.0 | 4.1 ± 1.2 | 0.527 |
| I can ease the patient’s anxiety about medication | 4.5 ± 0.8 | 4.6 ± 0.6 | 0.61 | 4.6 ± 0.8 | 4.6 ± 0.7 | 0.95 |
| I can understand the patient’s background and value system. | 4.4 ± 0.8 | 4.5 ± 0.7 | 0.52 | 4.5 ± 0.6 | 4.4 ± 0.8 | 0.456 |
| I can comprehend the patient’s medication adherence status | 4.1 ± 1.1 | 4.3 ± 0.9 | 0.22 | 4.1 ± 0.8 | 4.2 ± 1.1 | 0.627 |
| I can establish a trust relationship with the patient | 4.1 ± 1.1 | 4.5 ± 0.9 | 0.08 | 4.6 ± 0.6 | 4.1 ± 1.1 | 0.04 |
| I can maintain a good trust relationship with the patient | 4.2 ± 1.0 | 4.4 ± 0.9 | 0.17 | 4.6 ± 0.6 | 4.2 ± 1.0 | 0.076 |
| I can tell what to do when a side effect develops | 4.0 ± 1.2 | 3.8 ± 1.3 | 0.52 | 4.2 ± 1.0 | 3.8 ± 1.3 | 0.207 |
| I can provide information on side effects of antidepressants | 4.6 ± 0.8 | 4.5 ± 0.9 | 0.69 | 4.4 ± 0.9 | 4.5 ± 0.9 | 0.528 |
| I can appropriately instruct how to take antidepressants | 4.6 ± 0.8 | 4.4 ± 1.0 | 0.33 | 4.5 ± 0.6 | 4.5 ± 1.0 | 0.79 |
| I can provide guidance to patients with poor medication adherence | 4.5 ± 0.7 | 4.5 ± 0.6 | 0.86 | 4.6 ± 0.6 | 4.5 ± 0.6 | 0.406 |
| **Total score** | 50.2 ± 7.4 | 52.4 ± 5.7 | 0.12 | 52.8 ± 4.9 | 50.8 ± 7.1 | 0.178 |

Results are mean ± standers deviation. † Student's t-test.

Table S3. Pharmacists’ attitudes toward providing pharmaceutical care to patients with depression (n=86): Effect of gender and if Pharmacist or someone close to him/her suffer from depression

| **Task** | **Pharmacist or someone close to him/her suffer from depression** | | ***P* value‡** | **Gender** | | ***P* value‡** |
| --- | --- | --- | --- | --- | --- | --- |
| No  (n=40) | Yes  (n=46) | Male (n=26) | Female (n=60) |
| **How confident, comfortable, interested, and likely are you to obtain a medication history?** | | | | | | |
| Much less | 0 (0.0) | 2 (4.4) | 0.55 | 1 (3.8) | 1 (1.7) | 0.81 |
| less | 3 (7.5) | 2 (4.4) | 1 (3.8) | 4 (6.7) |
| Neutral | 15 (37.5) | 10 (21.7) | 8 (30.8) | 17 (28.3) |
| More | 14 (35.0) | 25 (54.3) | 12 (46.2) | 27 (45.0) |
| Much More | 8 (20.0) | 7 (15.2) | 4 (15.4) | 11 (18.3) |
| **How confident, comfortable, interested, and likely are you to screen for pharmacotherapy problems?** | | | | | | |
| Much less | 0 (0.0) | 1 (2.2) | 0.74 | 1 (4.0) | 0 (0.0) | 0.12 |
| less | 2 (5.0) | 1 (2.2) | 1 (4.0) | 2 (3.3) |
| Neutral | 11 (27.5) | 13 (28.9) | 9 (36.0) | 15 (25.0) |
| More | 19 (47.5) | 18 (40.0) | 10 (40.0) | 27 (45.0) |
| Much More | 8 (20.0) | 12 (26.7) | 4 (16.0) | 16 (26.7) |
| **How confident, comfortable, interested, and likely are you to monitor for efficacy and adverse effects?** | | | | | | |
| Much less | 0 (0.0) | 3 (6.5) | 0.92 | 2 (7.7) | 1 (1.7) | 0.01 |
| less | 1 (2.5) | 0 (0.0) | 0 (0.0) | 1 (1.7) |
| Neutral | 10 (25.0) | 8 (17.4) | 6 (23.1) | 12 (20.0) |
| More | 16 (40.0) | 20 (43.5) | 16 (61.5) | 20 (33.3) |
| Much More | 13 (32.5) | 15 (32.6) | 2 (7.7) | 26 (43.3) |
| **How confident, comfortable, interested, and likely are you to provide medication counseling?** | | | | | | |
| Much less | 0 (0.0) | 0 (0.0) | 0.768 | 0 (0.0) | 0 (0.0) | 0.59 |
| less | 2 (5.0) | 5 (10.9) | 2 (7.7) | 5 (8.3) |
| Neutral | 10 (25.0) | 5 (10.9) | 2 (7.7) | 13 (21.7) |
| More | 15 (37.5) | 21 (45.6) | 14 (53.8) | 22 (36.7) |
| Much More | 13 (32.5) | 15 (32.6) | 8 (30.8) | 20 (33.3) |

Results are n (%). †Pharmacists responded to each question with “much more”, “more”, “neutral”, “less”, or “much less.” ‡ Attitudes were compared by Wilcoxon Signed Rank Test. The p-values < 0.05 were considered significant.
